# Supplementary material for: Preparation of nitrogen-doped porous carbons for high-performance supercapacitor using biomass of waste lotus stems
Source: Royal Society of Chemistry journal article supplement (doi:10.1039/c7ra13013a), 2018-01-01
Supplement: c7ra13013a1.pdf [file c7ra13013a1.pdf]

1  
2  
3  
4  
5  
6

## Supporting Information

### Preparation of nitrogen-doped porous carbons with high-performance supercapacitor using biomass of waste lotus stems

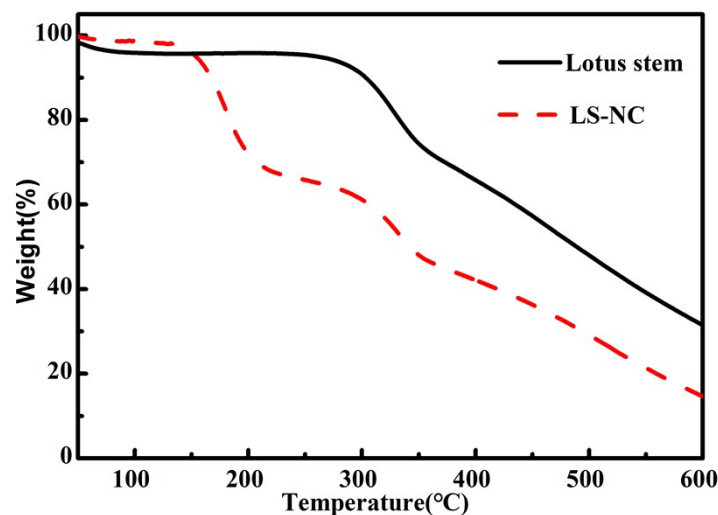

7  
8  
9

Fig. S1 TGA curves of waste Lotus stem and LS-NC under N<sub>2</sub> atmosphere.

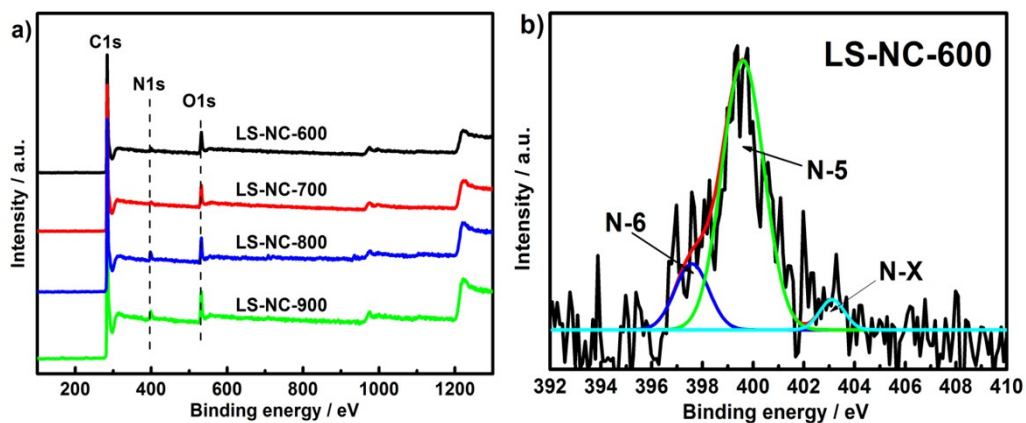

10 Fig. S2 General XPS spectrum of LS-NC-600, LS-NC-700, LS-NC-800 and LS-NC-900, respectively.  
11  
12  
13

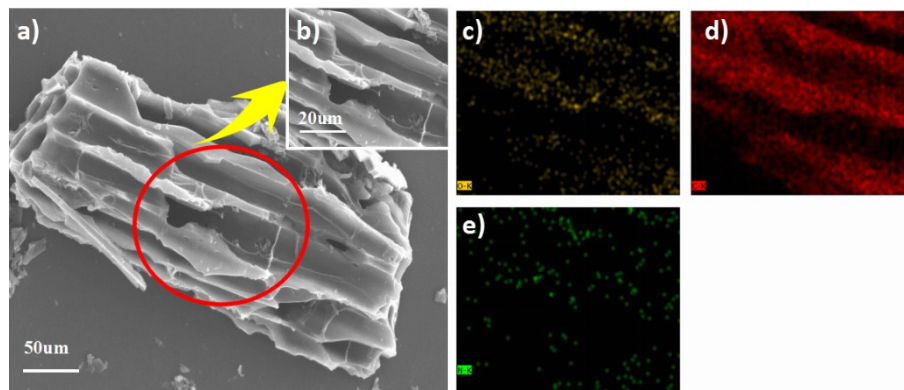

Fig. S3 The SEM images and mapping images of LS-NC-600.

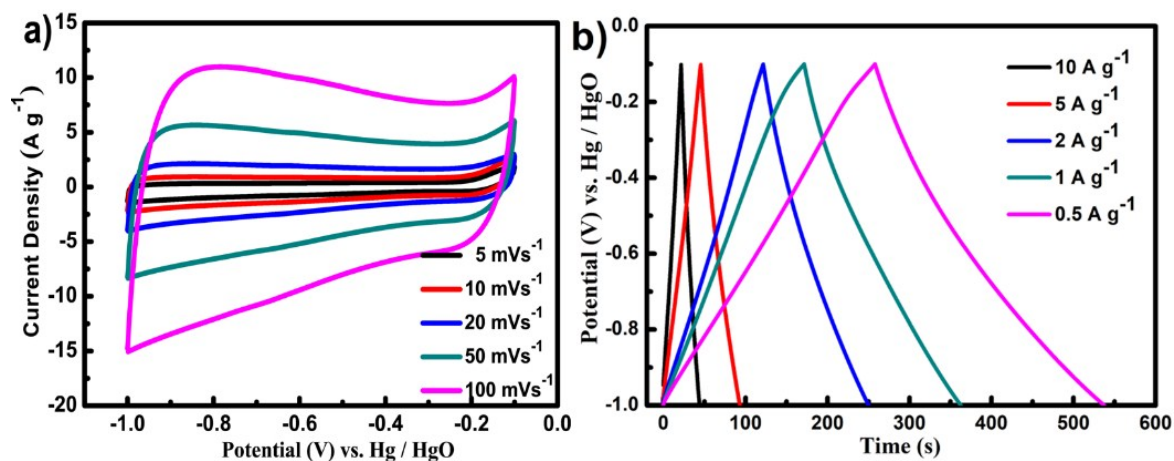

Fig. S4 a) CV curves of LS-NC-500 at different scan rates; b) GCD curves of LS-NC-500 at different current density

39 Table. S1 Textural parameters of LS-NC-600, LS-NC-700, LS-NC-800 and LS-NC-900, respectively.

| Sample    | Textural properties                                   |                                                       |                                                     |                                       |
|-----------|-------------------------------------------------------|-------------------------------------------------------|-----------------------------------------------------|---------------------------------------|
|           | $S_{\text{BET}}^{\text{a)}}[\text{m}^2\text{g}^{-1}]$ | $S_{\text{BET}}^{\text{b)}}[\text{m}^2\text{g}^{-1}]$ | $V_{\text{p}}^{\text{d)}}[\text{m}^3\text{g}^{-1}]$ | $D_{\text{a}}^{\text{d)}}[\text{nm}]$ |
| LS-NC-600 | 1322                                                  | 1088                                                  | 0.94                                                | 2.85                                  |
| LS-NC-700 | 2013                                                  | 1800                                                  | 1.17                                                | 2.34                                  |
| LS-NC-800 | 2221                                                  | 1876                                                  | 1.52                                                | 2.74                                  |
| LS-NC-900 | 1986                                                  | 1610                                                  | 1.46                                                | 2.94                                  |

40

41 a) The specific surface areas were calculated using the BET method.

42 b) Micropore surface area calculated from t-plot method.

43 c) The total pore volume was determined from the amount of nitrogen adsorbed at a relative pressure of  
44 0.99

45 d) Average pore diameter.

46

47

48

49 Table. S2 Summary of reported capacitive performance of the carbon materials.

| Biomass precursors        | $C_{\text{m}} / F \text{ g}^{-1}$    | Electrolyte    | Reference |
|---------------------------|--------------------------------------|----------------|-----------|
| Algae                     | 234 (at 0.5 A g <sup>-1</sup> )      | 6 M KOH        | 1         |
| longan shell              | 322 (at 0.5 A g <sup>-1</sup> )      | 6 M KOH        | 2         |
| Prawn shells              | 288 (at 5 A g <sup>-1</sup> )        | 6 M KOH        | 3         |
| Enteromorpha<br>prolifera | 296 (at 0.5 A g <sup>-1</sup> )      | 30 wt% KOH     | 4         |
| Willow catkin             | 298 (at 0.5 A g <sup>-1</sup> )      | 6 M KOH        | 5         |
| Potato                    | 255 (at 0.5 A g <sup>-1</sup> )      | 2 M KOH        | 6         |
| Rice husk                 | 243 (at 0.05 A g <sup>-1</sup> )     | 6 M KOH        | 7         |
| Horseweed                 | 184 (at 0.4 A g <sup>-1</sup> )      | 6 M KOH        | 8         |
| <b>Lotus stem</b>         | <b>360 (at 0.5 A g<sup>-1</sup>)</b> | <b>6 M KOH</b> | This work |

50

52 **References:**

- 53 1 Z. Tian, M. Xiang, J. Zhou, L. Hu and J. Cai, *Electrochim. Acta.*, 2016, **211**, 225-  
54 233.
- 55 2 H. Wei, H. Chen, N. Fu, J. Chen, G. Lan, W. Qian, Y. Liu, H. Lin and S. Han,  
56 *Electrochim. Acta.*, 2017, **231**, 403-411.
- 57 3 F. Gao, J. Qu, Z. Zhao, Z. Wang and J. Qiu, *Electrochim. Acta.*, 2016, **190**, 1134-  
58 1141.
- 59 4 X. Gao, X. Wei, J. Zhou, G. Wang, S. Zhuo, Z. Liu, Q. Xue and Z. Yan,  
60 *Electrochim. Acta.*, 2014, **133**, 459-466.
- 61 5 Y. Li, G. Wang, T. Wei, Z. Fan and P. Yan, *Nano Energy.*, 2016, **19**, 165-175.
- 62 6 G. Ma, Q. Yang, K. Sun, H. Peng, F. Ran, X. Zhao and Z. Lei, *Bioresour. Technol.*,  
63 2015, **197**, 137.
- 64 7 X. He, P. Ling, M. Yu, X. Wang, X. Zhang, M. Zheng, X. He, P. Ling, M. Yu and  
65 X. Wang, *Electrochim. Acta.*, 2013, **105**, 635-641.
- 66 8 L. Yuan, C. Feng, C. Wang, Z. Fu, X. Yang and Y. Tang, *J. Mater. Sci.*, 2016, **51**,  
67 3880-3887.
